# Supplementary material
Source: PubMed Central journal article supplement (PMC2756306)
Supplement: NIHMS125915-supplement-1.pdf [file NIHMS125915-supplement-1.pdf]

**Reviewer's Table.** Materials generated and assayed for these studies

|                                                | PT-304-AOA | PT-312-HGA  | PT-302-AG   | PT-406-GMB     |
|------------------------------------------------|------------|-------------|-------------|----------------|
| <u>Materials generated</u>                     |            |             |             |                |
| GS cultures                                    | ✓          | ✓           |             | ✓              |
| Initial xenograft<br>(take rate)               | ✓<br>(69%) | ✓<br>(100%) | ✓<br>(100%) | ✓<br>(100%)    |
| Passaged xenograft<br>(take rate)              |            | ✓<br>(100%) | ✓<br>(100%) | ✓<br>(92-100%) |
| <u>Assays</u>                                  |            |             |             |                |
| Survival Study<br>(cyclophamide daily)         | ✓          | ✓           |             | ✓              |
| Pharmacokinetics                               |            |             | ✓           |                |
| GLI1 inhibition                                |            | ✓           | ✓           | ✓              |
| hSHH expression                                | ✓          | ✓           | ✓           | ✓              |
| Survival Study<br>(cyclophamide twice daily)   |            | ✓           |             | ✓              |
| PTCH and/or GLI1<br>expression in CD133+ cells | ✓          | ✓           | ✓           | ✓              |
