# Supplementary material
Source: PubMed Central journal article supplement (PMC2756306)

Supplementary Figure 1

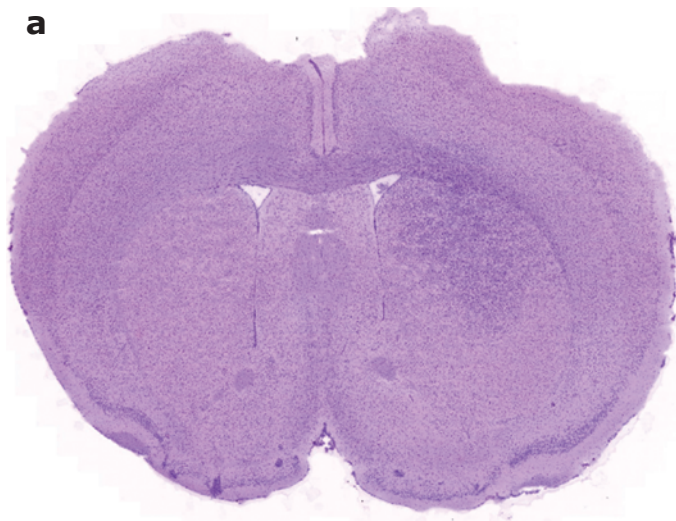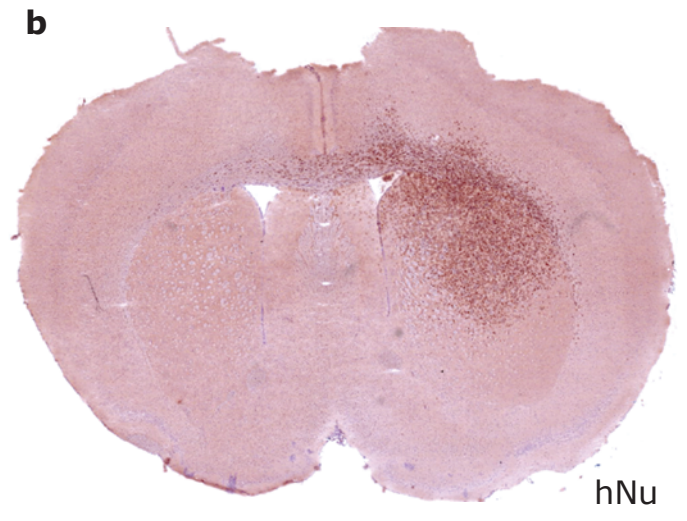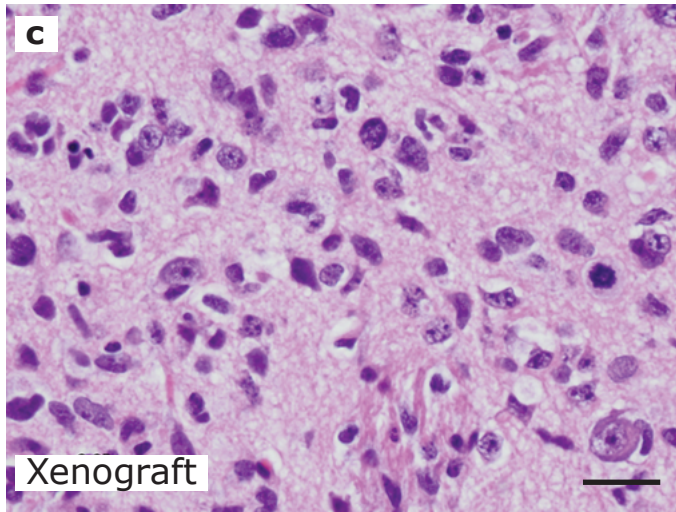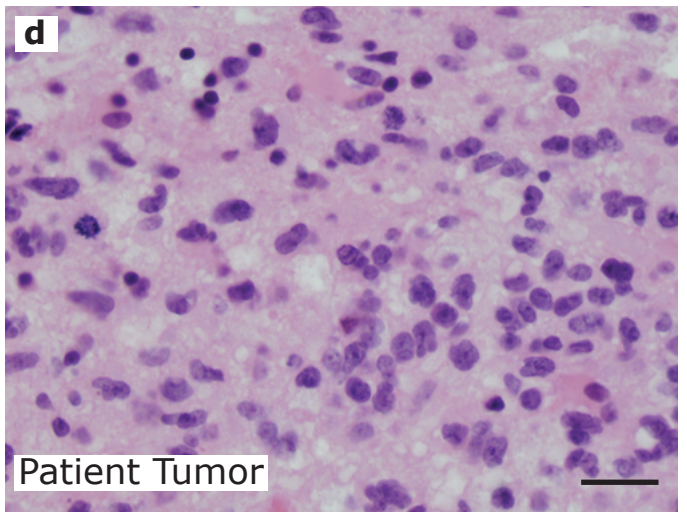

Supplement: NIHMS125915-supplement-2.pdf [file NIHMS125915-supplement-2.pdf]
